# Supplementary material for: Comprehensive Understanding of the Bacterial Populations and Metabolites Profile of Fermented Feed by 16S rRNA Gene Sequencing and Liquid Chromatography–Mass Spectrometry
Source: MDPI journal article supplement (doi:10.3390/metabo9100239), 2019-10-21

## Supporting Information

Table S1. The procedure of gradient elution.

| Time(min) | Flow rate(mL/min) | A(%) | B(%) |
|-----------|-------------------|------|------|
| 0         | 0.3               | 95   | 5    |
| 2         | 0.3               | 95   | 5    |
| 12        | 0.3               | 5    | 95   |
| 15        | 0.3               | 5    | 95   |
| 17        | 0.3               | 95   | 5    |

Figure S1. Rarefaction curves based on OTUs in fermented feed samples.

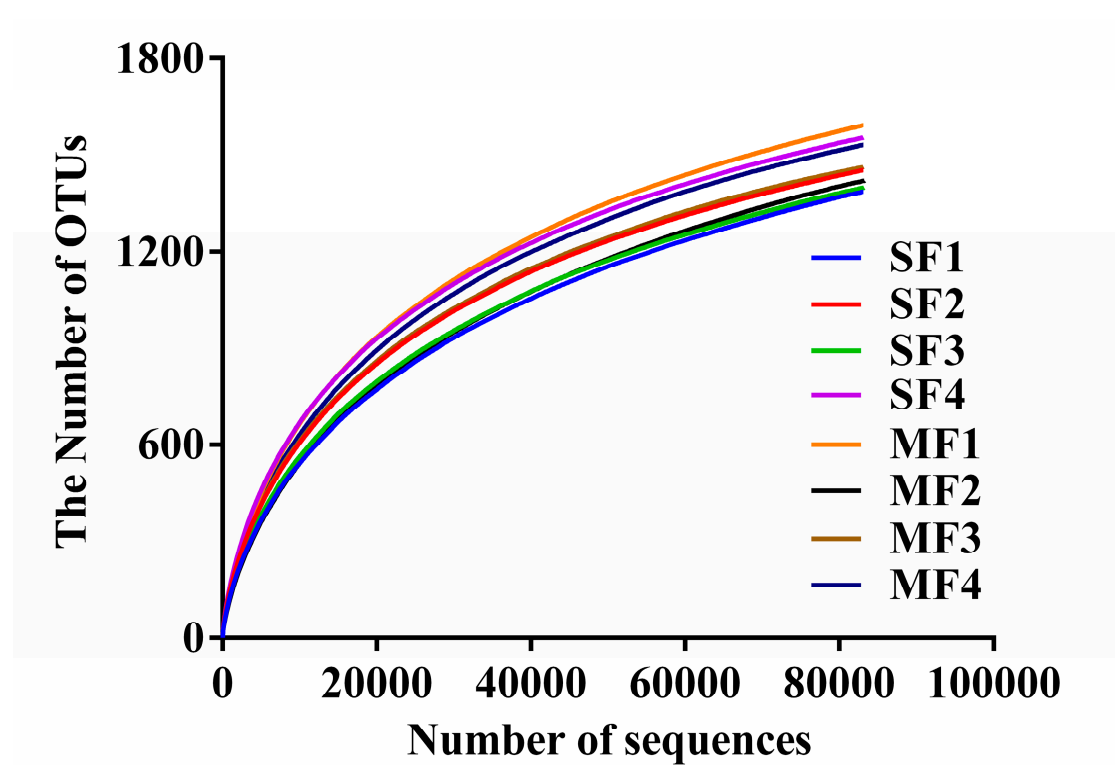

Supplement: s1 [file s1]
